RESEARCH ARTICLE

# Comparison of diagnostic algorithms used in guidelines on nutritional anaemias in adults

Margaretha G. M. Roemer<sup>1,2</sup>, Wendy P. J. den Elzen<sup>3,4</sup>, Rosalinde K. E. Poortvliet<sup>5,6</sup>, Jacobijn Gussekloo<sup>5,6,7</sup>, Steef Kurstjens<sup>8,9</sup>, Bauke A. de Boer<sup>1</sup>, Anne Margreet de Jong<sup>1\*</sup>

**1** Department of Clinical Chemistry, Unilabs/ Atalmedial Medical Diagnostic Centers, Amsterdam, the Netherlands, **2** Department of Clinical Chemistry, Haematology & Immunology, Noordwest Ziekenhuisgroep, Alkmaar, the Netherlands, **3** Laboratory Specialized Diagnostics & Research, Department of Laboratory Medicine, Amsterdam UMC, University of Amsterdam, Amsterdam, the Netherlands, **4** Amsterdam Public Health Research Institute & Amsterdam Gastroenterology and Endocrinology Metabolism, Amsterdam, the Netherlands, **5** Department of Public Health and Primary Care, Leiden University Medical Center, Leiden, the Netherlands, **6** LUMC Center for Medicine for Older people, Leiden, the Netherlands, **7** Section of Gerontology and Geriatrics, Department of Internal Medicine, Leiden University Medical Center, Leiden, the Netherlands, **8** Laboratory of Clinical Chemistry and Hematology, Jeroen Bosch Hospital, 's Hertogenbosch, the Netherlands, **9** Laboratory of Clinical Chemistry and Laboratory Medicine, Dicoon BV, location Canisius Wilhelmina Hospital, Nijmegen, the Netherlands

☞ These authors contributed equally to this work.

\* [anne-margreet.dejong@unilabs.com](mailto:anne-margreet.dejong@unilabs.com)

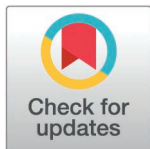

## OPEN ACCESS

**Citation:** Roemer MGM, den Elzen WPJ, Poortvliet RKE, Gussekloo J, Kurstjens S, de Boer BA, et al. (2025) Comparison of diagnostic algorithms used in guidelines on nutritional anaemias in adults. PLoS One 20(10): e0333688. <https://doi.org/10.1371/journal.pone.0333688>

**Editor:** Elizabeth S. Mayne, University of Cape Town Faculty of Science, SOUTH AFRICA

**Received:** January 6, 2025

**Accepted:** September 17, 2025

**Published:** October 3, 2025

**Peer Review History:** PLOS recognizes the benefits of transparency in the peer review process; therefore, we enable the publication of all of the content of peer review and author responses alongside final, published articles. The editorial history of this article is available here: <https://doi.org/10.1371/journal.pone.0333688>

**Copyright:** © 2025 Roemer et al. This is an open access article distributed under the terms of the [Creative Commons Attribution License](https://creativecommons.org/licenses/by/4.0/), which permits unrestricted use, distribution,

## Abstract

### Background

Anaemia is highly prevalent and commonly caused by nutritional deficiencies. Guidelines often include an algorithm to find the underlying cause. Here, we compared diagnostic algorithms and suggested laboratory tests for anaemia in clinical practice guidelines in countries with similar healthcare systems, focusing on iron, vitamin B12 and folate deficiency in the general adult population.

### Methods

We searched for diagnostic guidelines on anaemia in the Trip, Guidelines International Network and country specific databases. To be selected, the guidelines had to include diagnostic criteria or algorithms to determine the cause of anaemia in the general adult population.

### Results

In total, 14 records were included. For iron deficiency anaemia, guidelines varied in diagnostic criteria ranging from use of ferritin only, to ferritin in various combinations with a variety of other parameters, with different cut-off values. For vitamin B12 or folate deficiency, besides measurement of vitamin B12 or folate, some guidelines mentioned methylmalonic acid or homocysteine. Quality of evidence

and reproduction in any medium, provided the original author and source are credited.

**Data availability statement:** All relevant data are within the paper and its [Supporting information](#) files.

**Funding:** The author(s) received no specific funding for this work.

**Competing interests:** The authors have declared that no competing interests exist.

underlying cut-offs and parameters was variable, and laboratory aspects were underrepresented.

## Conclusions

There was a lot of variation in the included diagnostic algorithms, especially for iron deficiency anaemia. Differences in cut-off values were seen, even when using similar diagnostic strategies. Furthermore, supporting evidence was variable. Further research is needed to determine optimal algorithms. Our findings highlight the need for inclusion of relevant laboratory aspects in guidelines, appropriate diagnostics and clinical decision limits.

## Introduction

Anaemia is a highly prevalent disorder worldwide affecting up to 25% of the population [1,2], and is defined as a low number of red blood cells or a low haemoglobin concentration within the red blood cells for the age and sex of the individual [1]. Low haemoglobin concentrations result in a decreased capacity of the blood to carry oxygen to the tissues in the body. Consequently, symptoms include fatigue, weakness, dizziness and shortness of breath. Anaemia is not a diagnosis in itself, but often a presentation of an underlying condition. Anaemia is most frequently caused by nutrient deficiencies due to inadequate diets or inadequate absorption of nutrients, predominantly iron, vitamin B12 and folate. In addition, chronic diseases, infection, kidney failure, genetic disorders, bone marrow pathologies, and acute or chronic haemorrhage can cause anaemia [3,4]. It is therefore relevant to correctly diagnose the underlying cause of anaemia to adequately treat the patient.

General practitioners play a crucial role in the diagnosis and management of anaemia. The diagnosis typically involves a complete blood count (CBC) and further investigative assays to pinpoint the specific aetiology. Premature or unnecessary testing can lead to excessive use of diagnostic blood tests, while failure to test anaemic patients can result in incomplete or missed diagnoses or under- or overtreatment. Both scenarios can potentially increase healthcare costs [5–7].

To ensure effective and standardised care, anaemia guidelines have been developed. These guidelines typically encompass initial assessment, diagnostic testing, management and treatment, follow-up and monitoring. For different physiological settings, including age, sex, and pregnancy status or for specific patient groups, different guidelines for diagnosing anaemia have been developed. Also, different countries have varying requirements for the way in which guidelines are developed, who is involved in their development, and what sources are used. Therefore, the aim of this review was to compare the diagnostic algorithms and suggested laboratory tests for anaemia in clinical practice guidelines. Countries with similar healthcare systems were selected and we focused on the most common causes of anaemia: iron, vitamin B12 and folate deficiency in adults from the primary care population. This may provide guidance for the development or update of (novel) guidelines.

## Methods

### Data sources and searches

First, we searched for guidelines on anaemia in two guideline databases: Trip database (<https://www.tripdatabase.com>) and Guidelines International Network (G-I-N, <http://www.g-i-n.net>) on January 12<sup>th</sup> 2022. These databases were selected to search for evidence-based guidelines across the world. We performed an advanced search for 'anemia' or 'anaemia' in both databases. Second, we performed searches in country specific guideline databases (ao. Germany, UK, USA, Canada, Australia) on October 15<sup>th</sup> 2023. The most recent version of the guidelines was sought and used on February 29<sup>th</sup> 2024.

### Guideline selection

To be selected, the guidelines had to include diagnostic criteria or algorithms to find the cause of anaemia in the primary care adult population. We focused on nutritional deficiencies (iron, vitamin B12 and folate). Guidelines had to include criteria for adults and specific guidelines for children were excluded. When multiple guidelines from the same society were found, the most recent version was used. Guidelines focusing on specific populations (e.g., anaemia in pregnancy, chronic kidney disease, dialysis patients, heart failure, cancer), guidelines of which full versions were not available in English, Dutch or German and guidelines of which full versions were inaccessible online or withdrawn, were excluded. Two authors (combinations of MR, WdE, AdJ) independently assessed the titles and full texts of the guidelines retrieved during the searches against the inclusion and exclusion criteria, and selected or rejected as appropriate. Disagreement was resolved by consensus.

### Data extraction, quality assessment and analysis

The recommendations in the selected guidelines were extracted by two authors (WdE, AdJ) and checked by a third (MR). We rated the quality of the guidelines with a scoring system, based on the evidence underpinning the recommendations. Level 0: no evidence provided, level 1: based on expert opinion, level 2: based on randomised controlled trials/ peer reviewed studies before 2010 (for the test of interest), level 3: based on randomised controlled trials/ peer reviewed studies 2010 and later (for the test of interest), level 4: based on a systematic review/ meta-analysis. Note that guidelines that referred to studies before, as well as after 2010 were evaluated as level 3.

## Results

A total of 87 records were identified by the combined searches ([S1 Table](#)). Forty-four records were excluded due to the focus on a specific patient group. The remaining 43 full texts were screened and another 29 were excluded in line with the exclusion criteria ([Fig 1](#)). The 14 included guidelines originated from 6 different countries (US, UK, Germany, Canada, Qatar and the Netherlands).

### Patient population

We focused on guidelines in the primary care patient population. Nonetheless, a plethora of different anaemia guidelines were found that included specific organs, patient groups and underlying diseases. Therefore, we decided to select all guidelines focusing on the "general population". This included primary care, as well as secondary care guidelines in otherwise healthy people.

Age definitions for patient populations that were included in the different guidelines were variable. Most of the guidelines did not state a specific age definition [[8–15](#)], while others focused on age  $\geq 5$  years [[16](#)],  $> 12$  years [[17](#)],  $\geq 16$  years [[18,19](#)],  $\geq 18$  years [[20](#)] or on older adults [[21](#)]. Although all guidelines acknowledged that older people have a higher risk of developing anaemia, and/or suggested further diagnostics, no age-specific diagnostic algorithms were provided.

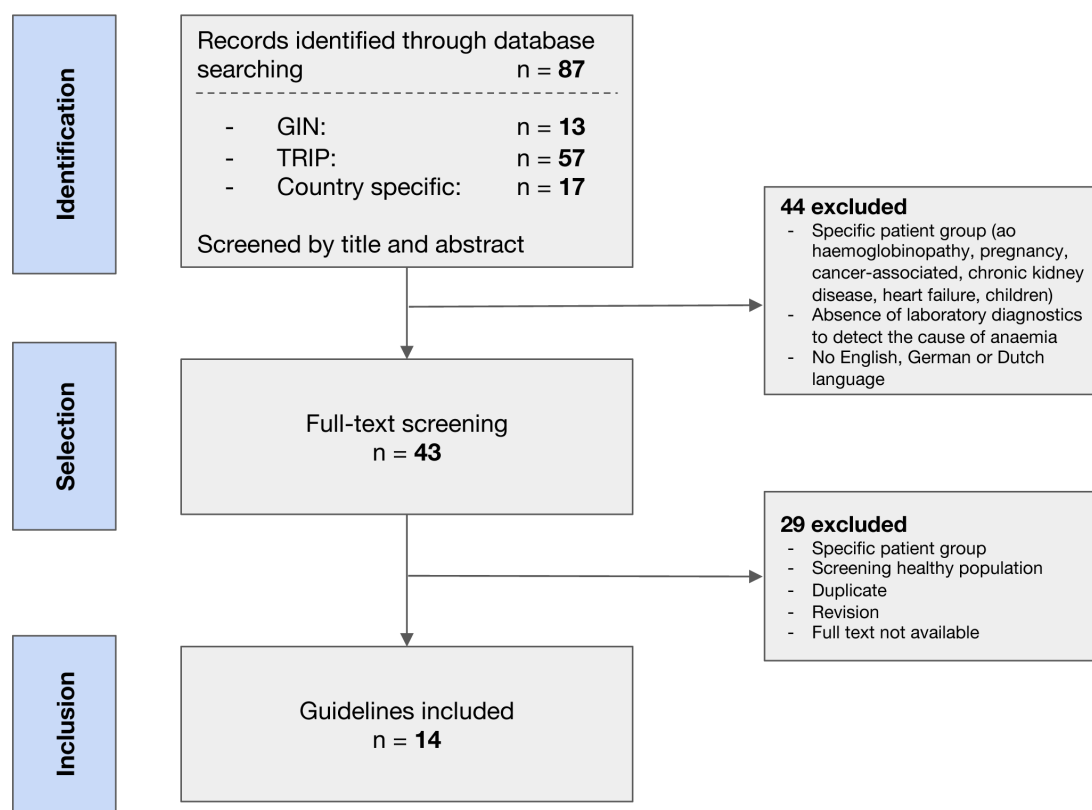

**Fig 1. Flowchart of selected guidelines.**

<https://doi.org/10.1371/journal.pone.0333688.g001>

## Definition of anaemia

According to the World Health Organization (WHO), anaemia is defined as a haemoglobin level <12.0g/dL in women and <13.0g/dL in men [1]. Most of the guidelines adhered to this definition [8,9,11–14,17,19,20], although one guideline used <13.5g/dL in men [16] and one guideline used <11.5g/dL in women (Table 1) [18]. Three guidelines did not specify a value for low haemoglobin, but referred to local laboratory reference values [10,15,21].

## Iron deficiency anaemia

For iron deficiency anaemia, there was a lot of variation in the included diagnostic criteria, as summarised in Table 2. Diagnostic criteria ranged from only ferritin, to ferritin in various combinations with mean corpuscular volume (MCV), iron, transferrin, transferrin saturation, total iron binding capacity (TIBC), C-reactive protein (CRP), erythrocyte sedimentation rate (ESR), reticulocyte haemoglobin content (Ret-Hb) and reticulocyte count, with different cut-off values. Of note, even when a similar strategy was used, differences in cut-off values were seen.

Testing of MCV was recommended in seven guidelines, in combination with ferritin [9–12,16,20,21]. Other erythrocyte indices (mean corpuscular haemoglobin, mean corpuscular haemoglobin concentration, red cell distribution width) were variably mentioned in a minority of the guidelines, and therefore not included in Table 2.

All guidelines included ferritin for the diagnosis of iron deficiency anaemia. Cut-offs ranged from <15 µg/L [15,18] to <30 µg/L [8,14,17,20] and <45 µg/L [13] or referred to the local lower limit of reference range [10–12,21]. Two guidelines used different ferritin cut-offs for men and women [9,16].

**Table 1. Summarized haemoglobin cut-offs in the included guidelines to define anaemia.**

| Guideline                                           | Year | Country         | Haemoglobin level                          | Evidence | Ref |
|-----------------------------------------------------|------|-----------------|--------------------------------------------|----------|-----|
| NHS Greater Glasgow and Clyde                       | 2022 | UK              | M < 13 g/dL,<br>F < 11.5 g/dL              | 1        | 18  |
| Centre for Perioperative Care                       | 2022 | UK              | M < 13 g/dL,<br>F < 12 g/dL *              | 4        | 8   |
| Association of Scientific Medical Societies Germany | 2021 | Germany         | M < 13 g/dL,<br>F < 12 g/dL                | 4        | 9   |
| British Society of Gastroenterology                 | 2021 | UK              | < N                                        | NA       | 10  |
| National Institute for Health and Care Excellence   | 2021 | UK              | M < 13 g/dL,<br>F < 12 g/dL                | 4        | 17  |
| Dutch College of General Practitioners              | 2021 | The Netherlands | M < 13 g/dL,<br>F < 12 g/dL #              | 4        | 11  |
| Ministry of Public Health Qatar                     | 2020 | Qatar           | M < 13 g/dL,<br>F < 12 g/dL                | 4        | 12  |
| American Gastroenterological Association            | 2020 | USA             | M < 13 g/dL,<br>F < 12 g/dL                | 4        | 13  |
| National Institute for Health and Care Excellence   | 2020 | UK              | M < 13 g/dL,<br>F < 12 g/dL #              | 4        | 19  |
| Royal College of Nursing                            | 2019 | UK              | M < 13 g/dL,<br>F < 12 g/dL                | 4        | 14  |
| BC guidelines                                       | 2019 | Canada          | < N                                        | NA       | 15  |
| Association of Scientific Medical Societies Germany | 2018 | Germany         | M < 13 g/dL,<br>F < 12 g/dL, Drop > 2 g/dL | 4        | 20  |
| Toward Optimized Practice                           | 2018 | Canada          | M < 13.5 g/dL, F < 12 g/dL #               | 1        | 16  |
| American Medical Directors Association              | 2007 | USA             | < N                                        | NA       | 21  |

Abbreviations: Ref, reference; M, male; F, female; N, normal; NA, not applicable.

\* international consensus statement in the peri-operative period: Hb < 13 g/dL for both sexes [22].

# Suggested cut-off values for assessment.

<https://doi.org/10.1371/journal.pone.0333688.t001>

The fact that ferritin is an acute phase protein and thus increases with infection or inflammation was recognized in all guidelines. Nonetheless, some guidelines only mentioned it [9,12,13,17,21], while other guidelines specified the ferritin level for which iron deficiency could still be considered in the presence of inflammation [11,15,16,18,20]. Measurement of CRP [8,14], or ESR and/or CRP [10] was recommended in three guidelines to confirm the presence of inflammation. Additional testing of transferrin saturation when a normal ferritin level was found was recommended in five guidelines [8,10,14,20,21].

Testing of the serum iron was recommended in three guidelines, in combination with MCV, ferritin, transferrin, transferrin saturation and/or TIBC [11,12,21]. Lastly, three guidelines recommended examination of Ret-Hb or reticulocyte count [8–10].

### Vitamin B12 or folate deficiency anaemia

Six vitamin B12 and folate deficiency anaemia guidelines were included. Most of these guidelines contained a combined anaemia diagnostic algorithm with iron deficiency [8,11,12,20,21] and one guideline specifically focused on vitamin B12 and folate deficiency (Table 3) [19]. All guidelines mentioned that vitamin B12 and/or folate anaemia is macrocytic. Four guidelines stated that the anaemia may also be normocytic [8,11,19,21].

For vitamin B12, one guideline recommended a specific cut-off [19], the other guidelines referred to local laboratory reference values. With regards to the use of total vitamin B12 (cobalamin) or active vitamin B12 (holotranscobalamin), four guidelines specifically recommended the (initial) testing of total vitamin B12 [8,11,19,20].

**Table 2. Summarized diagnostic algorithms of the included iron deficiency anaemia guidelines.**

| Guideline                                           | Year | Country         | MCV (fl) | Ferritin (µg/L)                   | Iron    | Trans-ferrin | Transferrin sat (%) | TIBC  | CRP (mg/L) or ESR | Ret-He/ Reticulocyte count | Evidence | Ref |
|-----------------------------------------------------|------|-----------------|----------|-----------------------------------|---------|--------------|---------------------|-------|-------------------|----------------------------|----------|-----|
| NHS Greater Glasgow and Clyde                       | 2022 | UK              |          | < 15 or 15–50 †                   |         |              |                     |       |                   |                            | 1        | 18  |
| Centre for Perioperative Care                       | 2022 | UK              |          | < 30 * or 30–100 †                |         |              | <20% *              |       | > 5 †             | < 30 pg *                  | 3        | 8   |
| Association of Scientific Medical Societies Germany | 2021 | Germany         | < 78     | M < 35, F < 23 or ≥ N †           |         |              |                     |       |                   | < 28 pg/ ≤ N               | 2        | 9   |
| British Society of Gastroenterology                 | 2021 | UK              | < N *    | < N or N *                        |         |              | Low *               |       | > N *             | < N *                      | 4        | 10  |
| National Institute for Health and Care Excellence   | 2021 | UK              |          | < 30 ‡                            |         |              |                     |       |                   |                            | 3        | 17  |
| Dutch College of General Practitioners              | 2021 | the Netherlands | ≤ N      | < N or < 100 † ‡                  | < N *   | > N *        |                     |       |                   |                            | 2        | 11  |
| Ministry of Public Health Qatar                     | 2020 | Qatar           | < N      | ≤ N ‡                             | < N     |              |                     | ≥ N   |                   |                            | 3        | 12  |
| American Gastroenterological Association            | 2020 | USA             |          | < 45 ‡                            |         |              |                     |       |                   |                            | 4        | 13  |
| Royal College of Nursing                            | 2019 | UK              |          | < 30 or 30–100 ^                  |         |              | < 20% ^             |       | > 5 ^             |                            | 1        | 14  |
| BC guidelines                                       | 2019 | Canada          |          | < 15 or 15–30 § or < 100 †        |         |              |                     |       |                   |                            | 2        | 15  |
| Association of Scientific Medical Societies Germany | 2018 | Germany         | < N      | < 30 * or 30 - 100 * or > 300 † ‡ |         |              | < 20% * or † ‡      |       |                   |                            | 3        | 20  |
| Toward Optimized Practice                           | 2018 | Canada          | < 75 *   | M < 30 *, F < 13 or < 100 †       |         |              |                     |       |                   |                            | 3        | 16  |
| American Medical Directors Association              | 2007 | USA             | < N      | < N or < N # or N †               | < N # † | > N #        | < N # †             | > N # |                   |                            | 2        | 21  |

Abbreviations: MCV, mean corpuscular volume; sat, saturation; TIBC, total iron binding capacity; CRP, C-reactive protein; ESR, erythrocyte sedimentation rate; Ret-He, reticulocyte haemoglobin equivalent; Ref, reference; M, male; F, female; N, normal; pg, picograms.

\* and/ or one of the other parameters with \*.

# and,

^ or,

† Patients with chronic (inflammatory) disease, active inflammation or malignancy,

‡ Ferritin is an acute phase protein and increases in patients with infection or inflammation,

§ Probably iron deficiency.

<https://doi.org/10.1371/journal.pone.0333688.t002>

In addition to vitamin B12, four guidelines mentioned testing for methylmalonic acid (MMA) and/or homocysteine, always in addition to vitamin B12 [12,21] or when the vitamin B12 level is in the lower normal reference range [11,20].

For folate, most guidelines recommended testing for serum folate only [8,11,21]. Two guidelines included RBC folate as a diagnostic criterion [19,20]. One guideline recommended measurement of lactate dehydrogenase (LDH) and reticulocyte count to diagnose folate, as well as vitamin B12 deficiency [11].

## Quality of the evidence

The quality of the included guidelines was evaluated and ranked for the indicated parameters (colour-coded in [Tables 1–3](#)). To define anaemia, WHO haemoglobin cut-offs were used in most guidelines [8,9,11–14,17,19–21]. Given the systematic nature of the evidence and recently unchanged cut-offs [23], this was regarded as level 4. For iron deficiency anaemia, two guidelines were considered level 4 [10,13], five guidelines level 3 [8,12,16,17,20], four guidelines level 2



**Table 3. Summarized diagnostic algorithms of the included vitamin B12/ folate deficiency anaemia guidelines.**

| Guideline                                           | Year | Country         | Vitamin B12 |                   |                 |                  |                  | Folate          |                     |     |          | Folate and vit. B12 |                         | Evi-<br>dence | Ref |
|-----------------------------------------------------|------|-----------------|-------------|-------------------|-----------------|------------------|------------------|-----------------|---------------------|-----|----------|---------------------|-------------------------|---------------|-----|
|                                                     |      |                 | MCV (fl)    | Vit. B12 (pmol/L) | Active vit. B12 | MMA              | Hcy              | Folate (nmol/L) | RBC folate (nmol/L) | MMA | Hcy      | LDH                 | Reticulo-<br>cyte count |               |     |
| Centre for Perioperative Care                       | 2022 | UK              | ≥ N         | < N               |                 |                  |                  | < N             |                     |     |          |                     |                         | 3             | 8   |
| Dutch College of General Practitioners              | 2021 | the Netherlands | ≥ N         | < N or low N *    |                 | Optional (1st) * | Optional (2nd) * | < N             |                     |     |          | > N                 | < N                     | 3             | 11  |
| National Institute for Health and Care Excellence   | 2020 | UK              | ≥ N         | < 148             |                 |                  |                  | < 7 or N #      | < 340 #             |     |          |                     |                         | 3             | 19  |
| Ministry of Public Health Qatar                     | 2020 | Qatar           | > N         | < N               |                 | > N              |                  | < N             |                     | N   |          |                     |                         | 3             | 12  |
| Association of Scientific Medical Societies Germany | 2018 | Germany         | > N         | < N or low N *    | Optional *      | Optional *       | Optional *       | < N ^           | Confirm             |     | Optional |                     |                         | 3             | 20  |
| American Medical Directors Association              | 2007 | USA             | ≥ N         | < N               |                 | > N              | > N              | < N             |                     |     |          |                     |                         | 2             | 21  |

Abbreviations: MCV, mean corpuscular volume; Vit, vitamin; MMA, methylmalonic acid; Hcy, homocysteine; RBC, red blood cell; LDH, lactate dehydrogenase; Ref, reference; N, normal.

\* and/ or one of the other parameters with \*.

# with normal vit. B12.

^ related to food intake, a second fasting blood test is required.

<https://doi.org/10.1371/journal.pone.0333688.t003>

[9,11,15,21] and two guidelines level 1 [14,18]. It must be noted that guidelines frequently referred to each other, but nonetheless used variable cut-offs. Five out of six vitamin B12 and folate deficiency anaemia guidelines were considered level 3 [8,11,12,19,20] and one guideline level 2 [21].

## Laboratory aspects

Laboratory aspects were only scarcely reported in the included guidelines. Even though laboratory measurements are used in all guidelines, none of the guidelines specified which manufacturer or measurement method was used to determine the specific cut-off values, and the type of material (e.g., plasma or serum) that should be used for the test of interest.

## Discussion

In primary care, the CBC is one of the most common blood tests, often done as a routine check-up. When a low haemoglobin is found, follow-up tests are used to investigate the cause of anaemia [24]. Here, we elucidated similarities and differences in diagnostic algorithms in evidence-based guidelines for the most common causes of anaemia: iron, vitamin B12 and folate deficiency. An overview of our observations and recommendations for future guidelines is summarised in Fig 2. In brief, we observed that primary and secondary care guidelines are intertwined, and that there is insufficient attention to diversity aspects. Furthermore, a lot of variation was seen in the recommended diagnostic criteria, cut-off values and evidence underpinning the algorithms, even in the presence of similar diagnostic strategies. Importantly, even though laboratory testing is proposed in all guidelines, the specifics of these tests are not described.

| Observation in current guidelines                                                                                                                                                                                                                                                                                                                                                                                                                                                                                                                                                                                                                                                                                                                                                                                                                                                                                             | Recommendation for future guidelines                                                                                                                                                                                                                                                                                                                                                                                                                                                                                                                                                                                                                                                                                                                                                                                                                                                                                                                                                                                                                                                                                                                                                        |
|-------------------------------------------------------------------------------------------------------------------------------------------------------------------------------------------------------------------------------------------------------------------------------------------------------------------------------------------------------------------------------------------------------------------------------------------------------------------------------------------------------------------------------------------------------------------------------------------------------------------------------------------------------------------------------------------------------------------------------------------------------------------------------------------------------------------------------------------------------------------------------------------------------------------------------|---------------------------------------------------------------------------------------------------------------------------------------------------------------------------------------------------------------------------------------------------------------------------------------------------------------------------------------------------------------------------------------------------------------------------------------------------------------------------------------------------------------------------------------------------------------------------------------------------------------------------------------------------------------------------------------------------------------------------------------------------------------------------------------------------------------------------------------------------------------------------------------------------------------------------------------------------------------------------------------------------------------------------------------------------------------------------------------------------------------------------------------------------------------------------------------------|
| <ol style="list-style-type: none"> <li>1. Plethora of different anaemia guidelines per organ, patient group and underlying disease for primary and secondary care</li> <li>2. No specific attention is paid to individual subgroups, such as age and sex</li> <li>3. Variation in algorithms in diagnostic criteria and cut-off values</li> <li>4. Most guidelines focus on inclusion of MCV</li> <li>5. Variation in used cut-off values for ferritin</li> <li>6. Variable views on how to deal with inflammation in patients with iron deficiency</li> <li>7. Not clear if total or active vitamin B12 should be used</li> <li>8. Lack of and/or variable quality of evidence</li> <li>9. Little to no awareness of laboratory aspects in guidelines <ol style="list-style-type: none"> <li>a. Different platforms produce different results</li> <li>b. No harmonization / standardization of tests</li> </ol> </li> </ol> | <ol style="list-style-type: none"> <li>1. Develop guidelines specifically for the primary and secondary care settings and align these</li> <li>2. Include aspects of diversity (at least age and sex) in diagnostic algorithms</li> <li>3. Further research is needed to determine optimal diagnostic algorithms</li> <li>4. MCV is not the most important diagnostic parameter, use MCV as a supportive parameter only</li> <li>5. The test for ferritin is not harmonized: refer to local laboratory reference ranges instead of mentioning actual cut-off values</li> <li>6. Mention the importance of acknowledging the presence of inflammation, especially for ferritin</li> <li>7. Align the recommended test for vitamin B12 deficiency</li> <li>8. Critically evaluate quality of evidence to include in guideline: rigorous methodology and well-defined approach</li> <li>9. Specifically mention laboratory aspects in guidelines <ol style="list-style-type: none"> <li>a. Specify the platform that is used to determine cut-offs</li> <li>b. When there is no harmonization / standardization of the test: refer to local laboratory reference ranges</li> </ol> </li> </ol> |

**Fig 2. Observations in current guidelines and recommendations for future guideline revisions with respect to anaemia.**

<https://doi.org/10.1371/journal.pone.0333688.g002>

## Patient population and diversity in diagnostic algorithms

Primary care, as well as secondary care guidelines for otherwise healthy people were included. For the development or update of (novel) guidelines, a focus on either the primary or secondary care setting is endorsed, as well as alignment between the recommendations of primary care and secondary care. Similar misalignments were observed in the field of subclinical hyperthyroidism [25].

Remarkably, no distinctions were made by sex or age in most of the diagnostic algorithms. However, research shows that sex differences may be of importance [26]. Nonetheless, the WHO did not find enough evidence for a change of ferritin cut-off values by sex [27]. Additionally, the diagnostic work-up and treatment of anaemia in older patients may be different from other age groups [28–30]. Hence, we recommend including at least age and sex, in the diagnostic algorithms.

## Included parameters in diagnostic algorithms

After anaemia is identified, most of the guidelines used the MCV to define the cause of the anaemia. However, a normal MCV does not exclude the presence of iron, vitamin B12 or folate deficiency [31]. Therefore, MCV should be mainly used as a supporting parameter.

For iron deficiency anaemia, ferritin was included in all algorithms. However, the cut-offs were variable, as has been previously described [32–35] and no proper justification for these cut-offs was provided. Despite an extensive review performed by the WHO, insufficient evidence was found for a consensus on the ferritin threshold and therefore the cut-off of <15 µg/L remained unchanged [27,32,33]. In the presence of inflammation, WHO recommends a cut-off of 70 µg/L to diagnose iron deficiency anaemia [27]. However, most guidelines recommended a ferritin cut-off of 100 µg/L in this situation. There is no consensus about which additional parameters should be evaluated. Furthermore, ferritin levels are affected by recent oral iron supplementation intake, coffee and other dietary factors [36]. Therefore, it is recommended to fast overnight and withhold supplements before measuring ferritin [37]. These factors are not adequately emphasized in guidelines, which can lead to diagnostic confusion.



For vitamin B12 and folate deficiency, most guidelines referred to local lower limit of reference values. Given the variation of used cut-offs in literature [38,39], this is a sensible approach. Not all guidelines specify if total vitamin B12 or active vitamin B12 should be tested. Also, additional testing of MMA and homocysteine is not consistently advised. To date, the most reliable parameter to detect vitamin B12 deficiency is still a matter of debate. According to Herbert's model (1986), active vitamin B12 is an earlier and more sensitive indicator of vitamin B12 deficiency [40,41], which was supported by later studies [42–45]. Nonetheless, other studies contradict this and state that the reliability of active and total vitamin B12 is similar [46,47].

These findings highlight the need for additional research to determine the most optimal parameters and cut-offs to diagnose anaemia caused by nutritional deficiencies.

### Laboratory aspects in guidelines

There is limited awareness of the laboratory aspects in anaemia guidelines, although all the algorithms use laboratory tests to determine the cause of anaemia. It must be noted that the ferritin, vitamin B12 and folate assays are not harmonised between platforms and there are substantial inter-analyser differences. The lack of harmonisation may result in different values when the same sample is measured in different labs using different analyser platforms [48–52]. Concentrations may also be dependent on the type of material, e.g., serum or plasma that is used for the analysis. In general, serum as well as plasma is acceptable for analysis. Nonetheless, higher or lower values may be found in specific types of material for ferritin, vitamin B12 and folate [44,51,53]. Therefore, if cut-offs are mentioned, the used sample type, analyser platform and method should be specified. Applying inappropriate cut-offs can lead to misinterpretation and may cause under- or overdiagnosis. Given the lack of harmonisation of ferritin, vitamin B12 and folate, at this point we recommend referring to local laboratory reference values or cut-offs provided by the local laboratory.

### Strengths and limitations

To our knowledge, this is the first study that systematically reviewed anaemia guidelines focusing on the diagnostics of the most common causes of anaemia. In addition to summarising diagnostic strategies, we present recommendations that may be used for developing new guidelines. A limitation of this study is that we only selected guidelines of countries with comparable healthcare systems that were available in Dutch, German or English, potentially missing other relevant guidelines. Nonetheless, our review provides an overview of diagnostic strategies from guidelines from all over the world.

### Conclusion

There was considerable variation in the included diagnostic criteria for anaemia caused by nutritional deficiencies in guidelines for the adult population. Even when similar diagnostic strategies were used, differences in cut-off values were seen and the supporting evidence was variable. Further research is needed to determine optimal algorithms. Even though laboratory tests are a fundamental aspect of the diagnostic algorithms, description of relevant laboratory aspects was lacking. For future guidelines, it will be important to include relevant laboratory aspects in guidelines, considering appropriate diagnostics and clinical decision limits.

### Supporting information

**S1 Table. Exclusion table.**  
(XLSX)

**S2 Table. PRISMA abstract checklist.**  
(DOCX)

**S3 Table. PRISMA checklist.**  
(DOCX)

**Author contributions**

**Conceptualization:** Margaretha G. M. Roemer, Wendy P. J. den Elzen, Bauke A. de Boer, Anne Margreet de Jong.

**Data curation:** Margaretha G. M. Roemer, Wendy P. J. den Elzen, Anne Margreet de Jong.

**Formal analysis:** Margaretha G. M. Roemer, Wendy P. J. den Elzen, Anne Margreet de Jong.

**Investigation:** Margaretha G. M. Roemer, Wendy P. J. den Elzen, Anne Margreet de Jong.

**Methodology:** Margaretha G. M. Roemer, Wendy P. J. den Elzen, Anne Margreet de Jong.

**Supervision:** Wendy P. J. den Elzen, Anne Margreet de Jong.

**Writing – original draft:** Margaretha G. M. Roemer, Wendy P. J. den Elzen, Anne Margreet de Jong.

**Writing – review & editing:** Margaretha G. M. Roemer, Wendy P. J. den Elzen, Rosalinde K. E. Poortvliet, Jacobijn Gussekloo, Steef Kurstjens, Bauke A. de Boer, Anne Margreet de Jong.

**References**

1. World Health Organization. Worldwide prevalence of anaemia 1993-2005 - WHO global database on anaemia. Edited by Bruno de Benoist, Erin McLean, Ines Egli and Mary Cogswell. 2008.
2. Safiri S, Kolahi AA, Noori M, Nejadghaderi SA, Karamzad N, Bragazzi NL, et al. Burden of anemia and its underlying causes in 204 countries and territories, 1990-2019: results from the Global Burden of Disease Study 2019. *J Hematol Oncol*. 2021;14(1):185.
3. Cascio MJ, DeLoughery TG. Anemia: Evaluation and Diagnostic Tests. *Med Clin North Am*. 2017;101(2):263–84. <https://doi.org/10.1016/j.mcna.2016.09.003> PMID: 28189170
4. Kassebaum NJ, Collaborators GBDA. The Global Burden of Anemia. *Hematol Oncol Clin North Am*. 2016;30(2):247–308.
5. de Jong A-M, Bozic C, Candido F, van Stralen KJ, de Boer BA. The cause of anemia is underdiagnosed in primary care. *Ned Tijdschr Geneesk*. 2023;167:D6680. PMID: 37078555
6. Zhi M, Ding EL, Theisen-Toupal J, Whelan J, Arnaout R. The landscape of inappropriate laboratory testing: a 15-year meta-analysis. *PLoS One*. 2013;8(11):e78962. <https://doi.org/10.1371/journal.pone.0078962> PMID: 24260139
7. Kip MMA, Oonk MLJ, Levin M-D, Schop A, Bindels PJE, Kusters R, et al. Preventing overuse of laboratory diagnostics: a case study into diagnosing anaemia in Dutch general practice. *BMC Med Inform Decis Mak*. 2020;20(1):178. <https://doi.org/10.1186/s12911-020-01198-8> PMID: 32736551
8. Centre for Perioperative Care. Guideline for the Management of Anaemia in the Perioperative Pathway. 2022. Available from: <https://cpoc.org.uk/guidelines-resources-guidelines/anaemia-perioperative-pathway>
9. Behnisch W, Muckenthaler M, Kulozik A. Arbeitsgemeinschaft der Wissenschaftlichen Medizinischen Fachgesellschaften. Eisenmangelanämie. 2021. Available from <https://register.awmf.org/de/leitlinien/detail/025-021>
10. Snook J, Bhala N, Beales ILP, Cannings D, Kightley C, Logan RP, et al. British Society of Gastroenterology guidelines for the management of iron deficiency anaemia in adults. *Gut*. 2021;70(11):2030–51. <https://doi.org/10.1136/gutjnl-2021-325210> PMID: 34497146
11. Bouma M, Burgers JS, Drost B, Den Elzen WPJ, Luchtman T, Oosterhuis WP, et al. Nederlands Huisarts Genootschap (NHG)-Standaard Anemie (M76). 2021. Available from <https://richtlijnen.nhg.org/standaarden/anemie>
12. Ministry of Public Health Qatar. National Clinical Guidelines: The Assessment & Management of Common Anaemias in Adults. 2020. Available from <https://www.isbtweb.org/resource/the-assessment-and-management-of-common-anaemias-in-adults--1--pdf.html>
13. Ko CW, Siddique SM, Patel A, Harris A, Sultan S, Altayar O, et al.; American Gastroenterological Association. AGA Clinical Practice Guidelines on the Gastrointestinal Evaluation of Iron Deficiency Anemia. *Gastroenterology*. 2020;159(3):1085–94. <https://doi.org/10.1053/j.gastro.2020.06.046> PMID: 32810434
14. Royal College of Nursing. Iron deficiency anaemia in adults. 2019. Available from <https://www.rcn.org.uk/Professional-Development/publications/pub-007460>
15. Ministry of Health, British Columbia. Doctors of BC. BCGuidelines. Iron Deficiency - Diagnosis and Management. 2019. Available from: <https://www2.gov.bc.ca/gov/content/health/practitioner-professional-resources/bc-guidelines/iron-deficiency>
16. Toward Optimized Practice Iron Deficiency Anemia Committee. Iron deficiency anemia clinical practice guideline. Edmonton, AB: Toward Optimized Practice; 2018. Available from <https://www.albertadoctors.org/media/atabokv2/iron-deficiency-anemia-guideline.pdf>
17. National Institute for Care and health Excellence (NICE). Iron deficiency anaemia. 2021. Available from: <https://cks.nice.org.uk>

18. NHS Greater Glasgow and Clyde. Clinical guideline. Iron deficiency Anaemia in Adults: Oral and Intravenous Iron Therapy Treatment. 2022. Available from: <https://rightdecisions.scot.nhs.uk/m/2295/ida.pdf>
19. National Institute for Care and health Excellence (NICE). Anaemia - B12 and folate deficiency. 2020. Available from: <https://cks.nice.org.uk>
20. Deutsche Gesellschaft für Anesthesiologie und Intensivmedizin in Kooperation mit der Arbeitsgemeinschaft der Wissenschaftlichen Medizinischen Fachgesellschaften. Präoperative Anämie: Diagnostik und Therapie der Präoperativen Anämie. 2018. Available from: <https://register.awmf.org/de/leitlinien/detail/001-024>
21. American Medical Directors Association. Anemia in the long-term care setting. 2007. Available from: <https://paltc.org/products/anemia-long-term-care-setting>
22. Muñoz M, Acheson AG, Auerbach M, Besser M, Habler O, Kehlet H, et al. International consensus statement on the peri-operative management of anaemia and iron deficiency. *Anaesthesia*. 2017;72(2):233–47. <https://doi.org/10.1111/anae.13773> PMID: 27996086
23. World Health Organization. Guideline on haemoglobin cutoffs to define anaemia in individuals and populations. 2024.
24. Fanshawe TR, Ordóñez-Mena JM, Turner PJ, den Bruel AV, Shine B, Hayward GN. Frequencies and patterns of laboratory test requests from general practice: a service evaluation to inform point-of-care testing. *J Clin Pathol*. 2018;71(12):1065–71. <https://doi.org/10.1136/jclinpath-2018-205242> PMID: 30228215
25. Ursem SR, Boelen A, Bruinstroop E, Elders PJM, Gussekloo J, Poortvliet RKE, et al. A systematic review of subclinical hyperthyroidism guidelines: a remarkable range of recommendations. *Eur Thyroid J*. 2024;13(3):e240036. <https://doi.org/10.1530/ETJ-24-0036> PMID: 38758966
26. Levi M, Simonetti M, Marconi E, Brignoli O, Cancian M, Masotti A, et al. Gender differences in determinants of iron-deficiency anemia: a population-based study conducted in four European countries. *Ann Hematol*. 2019;98(7):1573–82. <https://doi.org/10.1007/s00277-019-03707-w> PMID: 31073646
27. World Health Organization. WHO guideline on use of ferritin concentrations to assess iron status in individuals and populations. 2020.
28. den Elzen WPJ, Westendorp RGJ, Frölich M, de Ruijter W, Assendelft WJJ, Gussekloo J. Vitamin B12 and folate and the risk of anemia in old age: the Leiden 85-Plus Study. *Arch Intern Med*. 2008;168(20):2238–44. <https://doi.org/10.1001/archinte.168.20.2238> PMID: 19001201
29. den Elzen WPJ, Gussekloo J. Anaemia in older persons. *Neth J Med*. 2011;69(6):260–7. PMID: 21868809
30. Smelt AF, Gussekloo J, Bermingham LW, Allen E, Dangour AD, Eussen SJ, et al. The effect of vitamin B12 and folic acid supplementation on routine haematological parameters in older people: an individual participant data meta-analysis. *Eur J Clin Nutr*. 2018;72(6):785–95. <https://doi.org/10.1038/s41430-018-0118-x> PMID: 29520083
31. Schop A, Stouten K, Riedl JA, van Houten RJ, Leening MJG, Bindels PJE, et al. The accuracy of mean corpuscular volume guided anaemia classification in primary care. *Fam Pract*. 2021;38(6):735–9. <https://doi.org/10.1093/fampra/cmab034> PMID: 34345918
32. Garcia-Casal MN, Pasricha S-R, Martinez RX, Lopez-Perez L, Peña-Rosas JP. Are Current Serum and Plasma Ferritin Cut-offs for Iron Deficiency and Overload Accurate and Reflecting Iron Status? A Systematic Review. *Arch Med Res*. 2018;49(6):405–17. <https://doi.org/10.1016/j.arcmed.2018.12.005> PMID: 30573199
33. Garcia-Casal MN, Pasricha S-R, Martinez RX, Lopez-Perez L, Peña-Rosas JP. Serum or plasma ferritin concentration as an index of iron deficiency and overload. *Cochrane Database Syst Rev*. 2021;5(5):CD011817. <https://doi.org/10.1002/14651858.CD011817.pub2> PMID: 34028001
34. Peyrin-Biroulet L, Williet N, Cacoub P. Guidelines on the diagnosis and treatment of iron deficiency across indications: a systematic review. *Am J Clin Nutr*. 2015;102(6):1585–94. <https://doi.org/10.3945/ajcn.114.103366> PMID: 26561626
35. Richardson D, Brown K, Rusch J, Verburgh E, Louw V, Opie J. From the marrow to the blood: optimising the diagnosis of iron deficiency in the setting of inflammation. *Pathology*. 2025;57(1):87–93. <https://doi.org/10.1016/j.pathol.2024.06.015> PMID: 39419720
36. von Siebenthal HK, Moretti D, Zimmermann MB, Stoffel NU. Effect of dietary factors and time of day on iron absorption from oral iron supplements in iron deficient women. *Am J Hematol*. 2023;98(9):1356–63. <https://doi.org/10.1002/ajh.26987> PMID: 37357807
37. Balendran S, Forsyth C. Non-anaemic iron deficiency. *Aust Prescr*. 2021;44(6):193–6. <https://doi.org/10.18773/austprescr.2021.052> PMID: 35002031
38. Raghavan R, Ashour FS, Bailey R. A Review of Cutoffs for Nutritional Biomarkers. *Adv Nutr*. 2016;7(1):112–20. <https://doi.org/10.3945/an.115.009951> PMID: 26773019
39. Aparicio-Ugarriza R, Palacios G, Alder M, González-Gross M. A review of the cut-off points for the diagnosis of vitamin B12 deficiency in the general population. *Clin Chem Lab Med*. 2015;53(8):1149–59. <https://doi.org/10.1515/cclm-2014-0784> PMID: 25470607
40. Herbert V. The 1986 Herman award lecture. Nutrition science as a continually unfolding story: the folate and vitamin B-12 paradigm. *Am J Clin Nutr*. 1987;46(3):387–402.
41. Herbert V. Staging vitamin B-12 (cobalamin) status in vegetarians. *Am J Clin Nutr*. 1994;59(5 Suppl):1213S–22S.
42. Heil SG, de Jonge R, de Rotte MCFJ, van Wijnen M, Heiner-Fokkema RMR, Kobold ACM, et al. Screening for metabolic vitamin B12 deficiency by holotranscobalamin in patients suspected of vitamin B12 deficiency: a multicentre study. *Ann Clin Biochem*. 2012;49(Pt 2):184–9. <https://doi.org/10.1258/acb.2011.011039> PMID: 22302152
43. Jarquin Campos A, Risch L, Nydegger U, Wiesner J, Vazquez Van Dyck M, Renz H, et al. Diagnostic Accuracy of Holotranscobalamin, Vitamin B12, Methylmalonic Acid, and Homocysteine in Detecting B12 Deficiency in a Large, Mixed Patient Population. *Dis Markers*. 2020;2020:7468506. <https://doi.org/10.1155/2020/7468506> PMID: 32089757

44. Nexø E, Hoffmann-Lücke E. Holotranscobalamin, a marker of vitamin B-12 status: analytical aspects and clinical utility. *Am J Clin Nutr*. 2011;94(1):359S–365S. <https://doi.org/10.3945/ajcn.111.013458> PMID: [21593496](#)
45. Valente E, Scott JM, Ueland P-M, Cunningham C, Casey M, Molloy AM. Diagnostic accuracy of holotranscobalamin, methylmalonic acid, serum cobalamin, and other indicators of tissue vitamin B<sub>12</sub> status in the elderly. *Clin Chem*. 2011;57(6):856–63. <https://doi.org/10.1373/clinchem.2010.158154> PMID: [21482749](#)
46. Golding PH. Holotranscobalamin (HoloTC, Active-B12) and Herbert's model for the development of vitamin B12 deficiency: a review and alternative hypothesis. *Springerplus*. 2016;5(1):668. <https://doi.org/10.1186/s40064-016-2252-z> PMID: [27350907](#)
47. Remacha AF, Sardà MP, Canals C, Queraltó JM, Zapico E, Remacha J, et al. Role of serum holotranscobalamin (holoTC) in the diagnosis of patients with low serum cobalamin. Comparison with methylmalonic acid and homocysteine. *Ann Hematol*. 2014;93(4):565–9. <https://doi.org/10.1007/s00277-013-1905-z> PMID: [24057896](#)
48. Hoofnagle AN. Harmonization of blood-based indicators of iron status: making the hard work matter. *Am J Clin Nutr*. 2017;106(Suppl 6):1615S–1619S. <https://doi.org/10.3945/ajcn.117.155895> PMID: [29070558](#)
49. Devalia V, Hamilton MS, Molloy AM, British Committee for Standards in Haematology. Guidelines for the diagnosis and treatment of cobalamin and folate disorders. *Br J Haematol*. 2014;166(4):496–513. <https://doi.org/10.1111/bjh.12959> PMID: [24942828](#)
50. Choy KW, Sezgin G, Wijeratne N, Calleja J, Liwayan R, Rathnayake G, et al. Assessment of analytical bias in ferritin assays and impact on functional reference limits. *Pathology*. 2022;54(3):302–7. <https://doi.org/10.1016/j.pathol.2021.06.123> PMID: [34538480](#)
51. Owen WE, Roberts WL. Comparison of five automated serum and whole blood folate assays. *Am J Clin Pathol*. 2003;120(1):121–6. <https://doi.org/10.1309/L2U6-HH5K-AYG4-8L40> PMID: [12866382](#)
52. Kurstjens S, van Dam AD, Oortwijn E, den Elzen WPJ, Candido F, Kusters R, et al. Inconsistency in ferritin reference intervals across laboratories: a major concern for clinical decision making. *Clin Chem Lab Med*. 2024;63(3):600–10. <https://doi.org/10.1515/cclm-2024-0826> PMID: [39392623](#)
53. Ji Y, Faddy H, Hyland C, Flower R. A plasma ferritin is not always a serum ferritin. *Pathology*. 2015;47:S89–90.
